# Supplementary material for: Staphylococcal protein Ecb impairs complement receptor-1 mediated recognition of opsonized bacteria
Source: PubMed Central journal article supplement (PMC5342210; doi:10.1371/journal.pone.0172675), 2017-03-08
Supplement: pone.0172675.s001.pdf [file pone.0172675.s001.pdf]

### Band 1

Protein name: Chain A, Crystal Structure Of Efb-C From *Staphylococcus aureus*  
Alphalyse number: ALPHA09150  
GI-number: gi|145579437  
MW: 7184  
pI: 10,23  
Mascot score: 179  
Sequence coverage: 65%

**1 IKKEQKLIQA QNLVREFEKT HTVSAHRKAO KAVNLVSFEY KVKKMVLQER**  
**51 IDNVLKQGLV R**

### Band 2

Protein name: leukocidin LukS component [*Staphylococcus aureus* subsp. *aureus*]  
Alphalyse number: ALPHA09148  
GI-number: gi|13549150  
MW: 32563  
pI: 9,09  
Mascot score: 273  
Sequence coverage: 39%

**1 ANDTEDIGKG SDIEIKRTE DKTSNKWGV T QNIOFDFVKD KKYNKDALIL**  
**51 KMOGFISSRT TYNYKKTNH VKAMRWPFQY NIGLKTNDKY VSLINYLPKN**  
**101 KESTNVSQT LGYNIGGNFQ SAPSLGGNGS FNYSKISYT QQNYVSEVEQ**  
**151 QNSKSVLWGV KANSFATESG QKSAFDSDLF VGYKPHSKDP RDYFVPDSEL**  
**201 PPLVQSGFNP SFIATVSHEK GSSDTSEFEI TYGRNMDVTH AIKRSTHYGN**  
**251 SYLDGHRVHN AFVNRNYTVK YEVNWKTHEI KEKGQN**

### Band 3

Protein name: leukotoxin, LukE, putative [*Staphylococcus aureus* subsp. *aureus* NCTC 8325]  
Alphalyse number: ALPHA09148  
GI-number: gi|88195648  
MW: 33666  
pI: 9,33  
Mascot score: 294  
Sequence coverage: 38%

**1 MSVGLIAPLA SPIQESRANT NIENIGDGAE VIKRTEDVSS KKWGVTONVO**  
**51 FDFVKDKKYN KDALIVKMOG FINSRTSFSV VKGSGYELTK RMIWPFQYNI**  
**101 GLTTKDPNVS LINYLPKNKI ETTDVGQTLG YNIGGNFQSA PSIGGNQSFN**  
**151 YSKTISYTK SYVSEVDKQN SKSVKGVKA NEFVTPDGKK SAHDRYLFVQ**  
**201 SPNGPTGSAR EYFAPDNQLP PLVQSGFNPS FITTLSHEKG SSSDTSEFEIS**  
**251 YGRNLDITYA TLPRTGIYA ERKHNAFVNR NFVVR YEVNWKTHEIKVKGH**  
**301 N**
